# Supplementary material
Source: HighWire-hosted journal article supplement (https://www.life-science-alliance.org/content/3/9/e202000775/F5)
Supplement: inline-supplementary-material-5 [file inline-supplementary-material-5.pdf]

|      |                                                               |     |
|------|---------------------------------------------------------------|-----|
| 2CPA | AQADDLPLVGNKAPDFEAEAVFDQEFIKVKLSDYIGKKYVILFFYPLDFTFVCPTEITAF  | 60  |
| 2CPB | AQADDLPLVGNKAPDFEAEAVFDQEFIKVKLSEYIGKKYVILFFYPLDFTFVCPTEITAF  | 60  |
|      | ***** ; *****                                                 |     |
| 2CPA | SDRHSEFEKLNTEVLGVSVDVFSHLAWVQDRKSGGLGDLNYPLISDVTKSIKSFVGL     | 120 |
| 2CPB | SDRYEEFEKLNTEVLGVSVDVFSHLAWVQDRKSGGLGDLNYPLVSDITKSIKSFVGL     | 120 |
|      | *** ; ***** ; ** ; *****                                      |     |
| 2CPA | IHDQGIALRGLFIIIDKEGVIQHSTINNLGIGRSVDETMRTLQALQYIQENPDEVCPAGWK | 180 |
| 2CPB | IPDQGIALRGLFIIIDKEGVIQHSTINNLGIGRSVDETMRTLQALQYVQENPDEVCPAGWK | 180 |
|      | * ***** ; *****                                               |     |
| 2CPA | PGEKSMKPDPKLSKEYFSAI                                          | 200 |
| 2CPB | PGEKSMKPDPKLSKEYFSAI                                          | 200 |
|      | *****                                                         |     |
